# Supplementary material for: Directed Evolution of Human Heavy Chain Variable Domain (VH) Using In Vivo Protein Fitness Filter
Source: PubMed Central journal article supplement (PMC4043505; doi:10.1371/journal.pone.0098178), 2014-06-03
Supplement: pone.0098178.s001.pdf [file pone.0098178.s001.pdf]

Supporting Figure S1

**A**

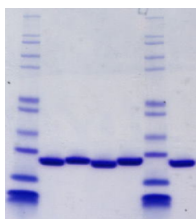

MW

1

2

3

4

MW

5

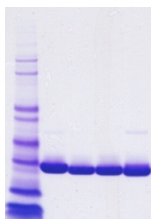

MW

6

7

8

9

**B**

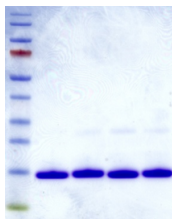

MW

1

2

3

4
