# Supplementary material for: Directed Evolution of Human Heavy Chain Variable Domain (VH) Using In Vivo Protein Fitness Filter
Source: PubMed Central journal article supplement (PMC4043505; doi:10.1371/journal.pone.0098178), 2014-06-03
Supplement: pone.0098178.s002.pdf [file pone.0098178.s002.pdf]

**Supporting Table S1. Oligonucleotides used in this study.**

| Number | Primer sequences <sup>a</sup>                                                                                                 | Note <sup>b</sup>       |
|--------|-------------------------------------------------------------------------------------------------------------------------------|-------------------------|
| 1      | GCCATATGAACAATAACGATCTCTTTCAGG<br>CATCACGT                                                                                    |                         |
| 2      | GCGGATCCATGGTGGTGGTGGTGGTGC<br>GGCCGCTGAAGAGACGGTCACCAACGTGCC                                                                 |                         |
| 3      | GCGCGGCCGCACACCCAGAAACGCTGGTG                                                                                                 |                         |
| 4      | GCGGATCCTTACCAATGCTTAATCAGTGAGGC                                                                                              |                         |
| 5      | GCCCATGGCAGGTKCAGCTGGTGCAG                                                                                                    | VH1a, sense             |
| 6      | GCCCATGGCAGGTCCAGCTTGTGCAG                                                                                                    | VH1b, sense             |
| 7      | GCCCATGGSAGGTCCAGCTGGTACAG                                                                                                    | VH1c, sense             |
| 8      | GCCCATGGCARATGCAGCTGGTGCAG                                                                                                    | VH1d, sense             |
| 9      | GCCCATGGGARGTGCAGCTGGTGGAG                                                                                                    | VH3a, sense             |
| 10     | GCCCATGGCAGGTGCAGCTGGTGGAG                                                                                                    | VH3b, sense             |
| 11     | GCCCATGGGAGGTGCAGCTGTTGGAG                                                                                                    | VH3c, sense             |
| 12     | GCCCATGGGARGTGCAGCTGGTGCAG                                                                                                    | VH5a, sense             |
| 13     | GCGCGGCCGCTGAGGAGACGGTGAC                                                                                                     | JH1,4,5,6,<br>antisense |
| 14     | GCGCGGCCGCTGAGGAGACAGTGAC                                                                                                     | JH2, antisense          |
| 15     | GCGCGGCCGCTGAAGAGACGGTGAC                                                                                                     | JH3, antisense          |
| 16     | GCCCATGGGAAGTCCAAGTGAATCTGGTG<br>GCGGTTTAGTT                                                                                  |                         |
| 17     | AGTTGAACCGCCAGAGCCGAAATMNNTGAGAC<br>MNNTTCMNNACCTTTGCCTGGCGCMNNACGCAC<br>CCAGCCCATAGCATAAGAAGAAAAGGTAAAGCCA<br>CTTGCAGCACAGCT |                         |
| 18     | ATTTCCGGCTCTGGCGGTTCAACTNKNKTACNNKG<br>ATAGCGTTAAAGGTCGTTTCACAATCTCC                                                          |                         |
| 19     | GCGCGGCCGCACTGCTCACAGTAACCAGGGTAC<br>CCTG                                                                                     |                         |

<sup>a</sup>K means G or T; S means C or G; R means A or G; M means A or C; and N means A, T, G, or C

<sup>b</sup>Sense and antisense primers sets for amplifying the V<sub>H</sub>1, V<sub>H</sub>3, and V<sub>H</sub>5 genes (<http://vbase.mrc-cpe.cam.ac.uk>)
