# Supplementary material for: Directed Evolution of Human Heavy Chain Variable Domain (VH) Using In Vivo Protein Fitness Filter
Source: PubMed Central journal article supplement (PMC4043505; doi:10.1371/journal.pone.0098178), 2014-06-03
Supplement: pone.0098178.s003.pdf [file pone.0098178.s003.pdf]

**Supporting Table S2. Data collection and structure Solution parameters.**

| Crystal type                                             | MG2x1                                                                | MG8-4                                                             | MG8-14                                                            |
|----------------------------------------------------------|----------------------------------------------------------------------|-------------------------------------------------------------------|-------------------------------------------------------------------|
| Unit cell parameters (Å)                                 | a=104.41 b=55.70<br>c=74.53<br>$\sigma=90$ $\beta=126.4$ $\gamma=90$ | a=87.07 b=87.07<br>c=55.73<br>$\sigma=90$ $\beta=90$ $\gamma=120$ | a=56.20 b=56.20<br>c=81.52<br>$\sigma=90$ $\beta=90$ $\gamma=120$ |
| Resolution (Å)                                           | 1.96 – 31.97                                                         | 1.96 – 34.3                                                       | 2.47 – 28.1                                                       |
| Space group                                              | C 2                                                                  | P3 2 1                                                            | P3 <sub>2</sub> 2 1                                               |
| Completeness (%)                                         | 99.2 (92.5) <sup>a</sup>                                             | 99.3 (86.7) <sup>a</sup>                                          | 99.9 (100) <sup>a</sup>                                           |
| R <sub>sym</sub> (%) <sup>b</sup>                        | 9.9 (31.2)                                                           | 11.3 (42.3)                                                       | 10.3 (31.7)                                                       |
| I / $\sigma$ (%)                                         | 39.1 (9.3)                                                           | 48.4 (10.8)                                                       | 53.9 (15.0)                                                       |
| No. of refined atoms<br>Protein / water                  | 1794 / 216                                                           | 1783 / 281                                                        | 919 / 44                                                          |
| R <sub>factor</sub> / R <sub>free</sub> (%) <sup>c</sup> | 25.2 (29.7)                                                          | 17.7 (23.1)                                                       | 19.1 (24.5)                                                       |
| r.m.s.d bond length (Å)                                  | 0.009                                                                | 0.008                                                             | 0.006                                                             |
| r.m.s.d bond angle                                       | 1.1                                                                  | 1.2                                                               | 1.1                                                               |
| Ramachandran plot (%)                                    |                                                                      |                                                                   |                                                                   |
| Most favored region                                      | 98.3                                                                 | 96.2                                                              | 99.2                                                              |
| Additionally allowed region                              | 1.7                                                                  | 3.8                                                               | 0.8                                                               |
| Residues in outlier region                               | 0                                                                    | 0                                                                 | 0                                                                 |

<sup>a</sup>Numbers in parentheses are statistics from the highest resolution shell.

<sup>b</sup> $R_{\text{sym}} = \sum |I_{\text{obs}} - I_{\text{avg}}| / \sum I_{\text{obs}}$ , where  $I_{\text{obs}}$  is the observed individual reflection and  $I_{\text{avg}}$  is the average over symmetry equivalents.

<sup>c</sup> $R_{\text{factor}} = \sum ||F_o| - |F_c|| / \sum |F_o|$ , where  $|F_o|$  and  $|F_c|$  are the observed and calculated structure factor amplitudes, respectively.  $R_{\text{free}}$  was calculated using 5% of the data.
